# Supplementary material
Source: publisher figshare collection journal article supplement (https://acs.figshare.com/ndownloader/files/4156876)
Supplement: Supplementary file 1 [file 4156876]

# Ab Initio Molecular Dynamics study of the AlOOH boehmite/water interface: role of steps in interfacial Grotthus proton transfers

A. Motta, M-P. Gaigeot and D. Costa

## Supplementary Information

### S1: Water organization in between the two slabs (periodic boundary conditions)

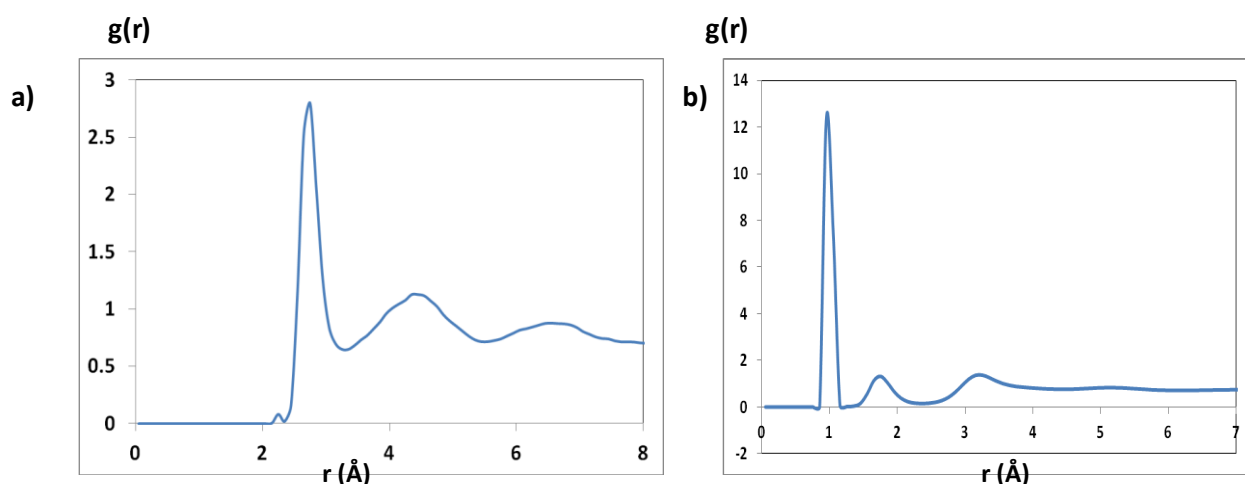

**Figure S1** : Normalized radial distribution functions (rdf) of water oxygen-oxygen (Ow-Ow) and oxygen-hydrogen (Ow-Hw) pairs in the water slab in-between the two surfaces (which geometry is shown in Figure 1 of the article).

These curves are representative of liquid water.<sup>i-ii</sup> The hydrogen bond between water molecules is 1.7 Å long on average. The integrated rdf function indicates that each O has 4.07 water molecules as first neighbours ( $d < 3.25$  Å). This confirms that the “confined” water inbetween the two slabs (Periodic Boundary Conditions applied in our simulations) behaves as liquid water.

## S2 : Statistical Analysis of the surface hydroxyls O-H populations.

**Tables S2-I** and **II** report the results of the statistical analyses on the nature of the hydroxyls at the surface of the boehmite surface, in terms of  $\mu_1$ -O (Table S2-I) and  $\mu_2$ -O (Table S2-II) sites. The cut-off value applied for considering a covalent bond between O and H is the O-H distance lower than 1.25 Å, a value taken from the rdf analysis. The nomenclature chosen for the O atoms is shown in Scheme 1 (also shown in the main text).

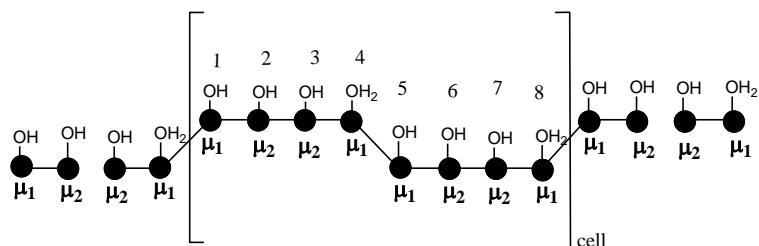

**Scheme 1** : Repartition of the different OH species on the surface.

| Table S2-I | Position 1               |             | Position 4               |             | Position 5               |             | Position 8               |             |
|------------|--------------------------|-------------|--------------------------|-------------|--------------------------|-------------|--------------------------|-------------|
| nature     | $\mu_1$ -OH <sub>2</sub> | $\mu_1$ -OH |
| %          | 4.5                      | 95.5        | 90.9                     | 9.1         | 30.8                     | 69.2        | 78.6                     | 21.4        |

| Table S2-II | Position 2               |             | Position 3               |             | Position 6               |             | Position 7               |             |
|-------------|--------------------------|-------------|--------------------------|-------------|--------------------------|-------------|--------------------------|-------------|
| nature      | $\mu_2$ -OH <sub>2</sub> | $\mu_2$ -OH |
| %           | 2.5                      | 97.5        | 7.7                      | 92.3        | 3.2                      | 96.8        | 1.1                      | 98.9        |

### S3 : Radial distribution functions (rdf) and hydrogen bond networks

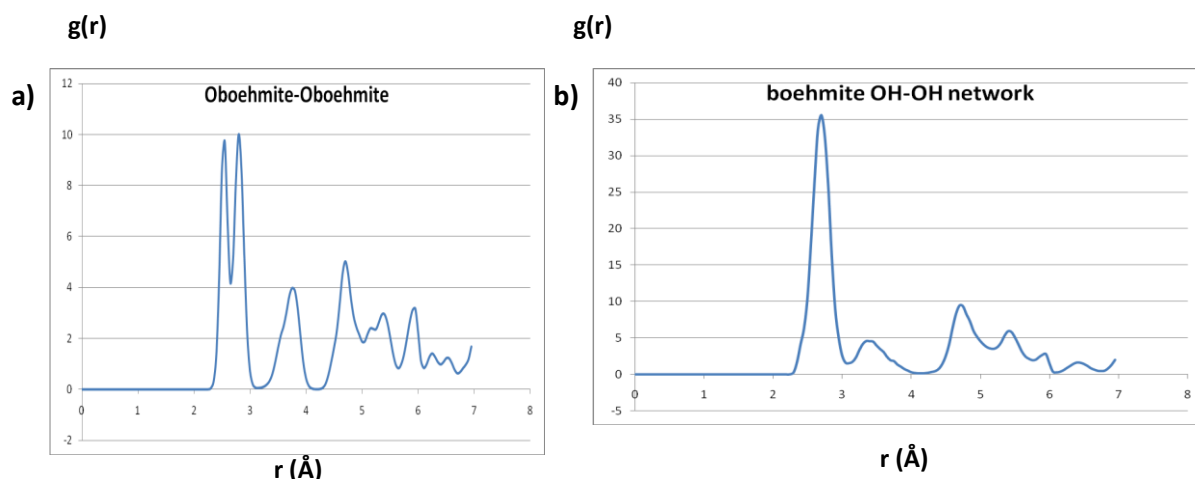

**Figure S3-1** : O-O rdf between the oxygen atoms in boehmite: a) in the bulk and b) at the surface of boehmite, i.e. between hydroxyls oxygens.

In **Figure S3-1a**, the crystalline network is clearly identified by the net minima indicating the first, second and third neighbors of each O atom. We also notice (**Figure S3-1b**) the ordering for the surface groups, which reflects the underlying crystalline order.

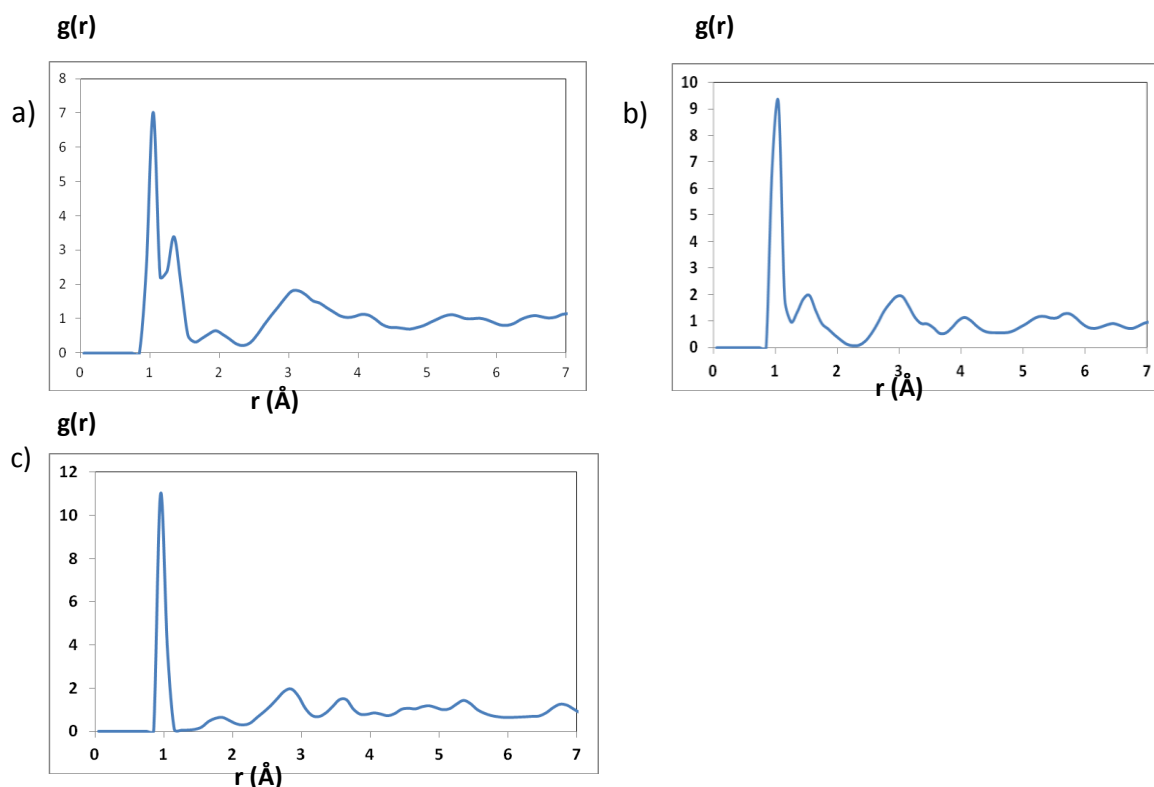

**Figure S3-2** : O-H rdf functions between Oxygens belonging to the hydroxyls at the boehmite surface (in positions 1 to 8) and hydrogens belonging to water and to hydroxyls. a) case of  $\mu 1$ -OH groups, top edge, positions 1 and 4, b) Case of  $\mu 1$ -OH groups, low step, position 5 and 8 and c) Case of  $\mu 2$ -OH groups, low terrace, position 2, 3, 6 and 7.

- 
- <sup>i</sup> J. M. Sorenson, G. Hura, R. M. Glaeser, and T. Head-Gordon, [J. Chem. Phys.](#) **113**, 9149.
- <sup>ii</sup> A. K. Soper, [Chem. Phys.](#) **258**, 121 s2000.
